# Supplementary material
Source: PubMed Central journal article supplement (PMC5121388)

**Figure S1:**

Receiver operator characteristic (ROC) curves for cytometer WBC counts and dipstick urinalysis: The ROC curves for each urinalysis test are presented. The AUC for dipstick analysis LE and Nitrites were 0.92 (95%CI 0.90-0.94) and 0.83 (95%CI 0.80-0.87), respectively, as compared with 0.99 (95%CI 0.98-0.99) for cytometer leukocytes counts. A statistically significant difference was found ( $P < 0.001$ ).

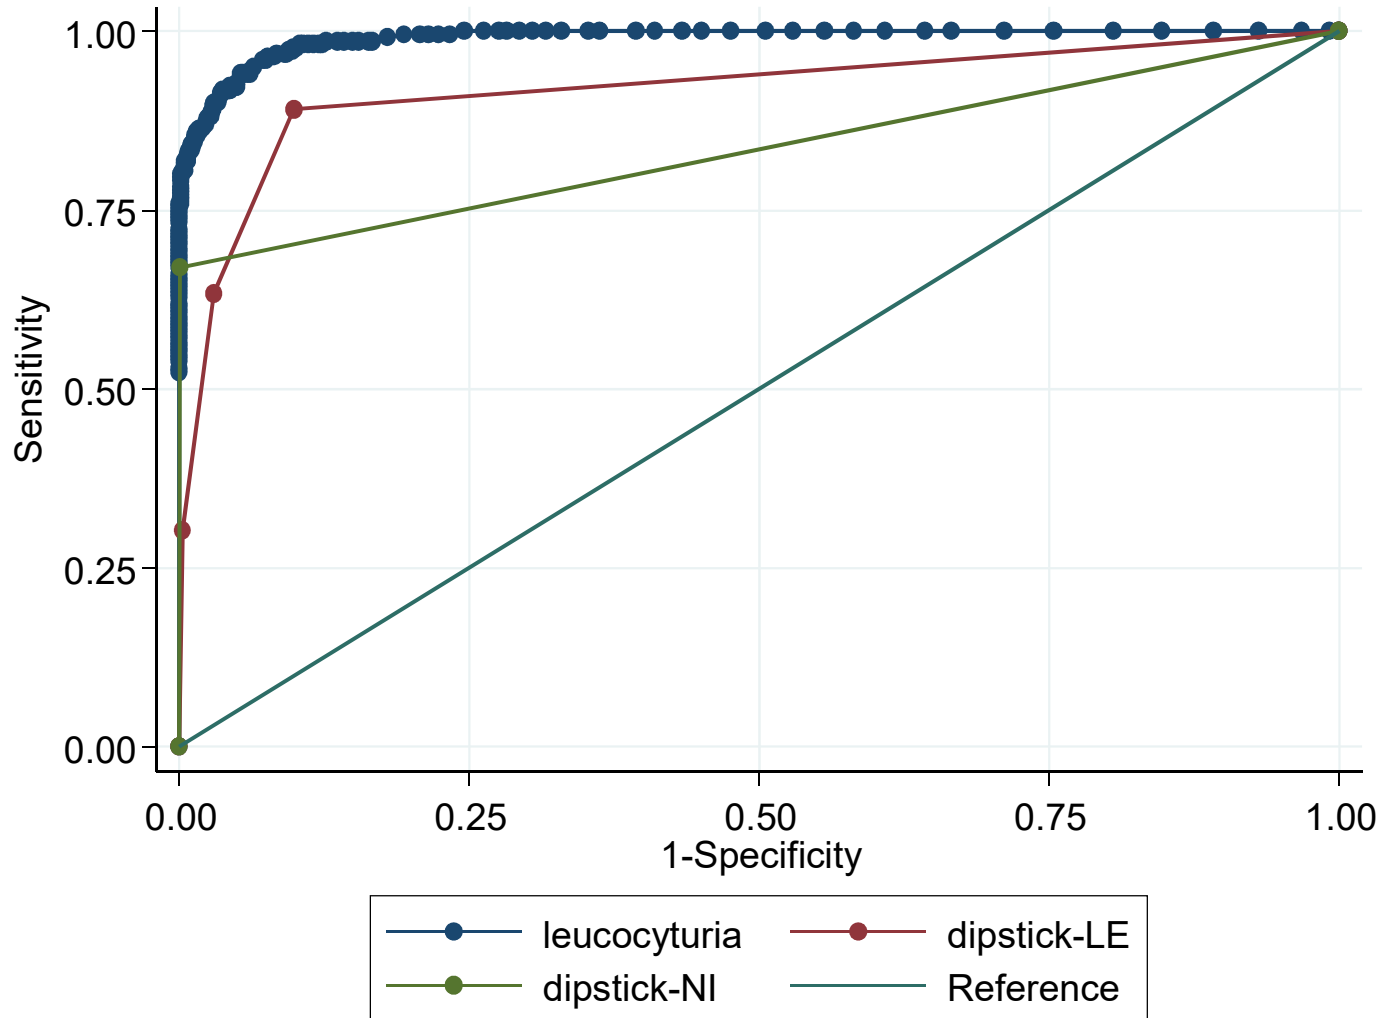

Supplement: JCM.01382-16_zjm999095233so1.pdf [file JCM.01382-16_zjm999095233so1.pdf]
